# Supplementary material
Source: publisher site journal article supplement (https://www.dovepress.com/article/347862)
Supplement: Supplementary file 1 [file get_supplementary_file.php]

**S1 Table. STROBE Statement.** Checklist of items that should be included in reports of cross-sectional studies

|  | Item No. | Recommendation | Page  No. | Relevant text from manuscript |
| --- | --- | --- | --- | --- |
| **Title and abstract** | 1 | (*a*) Indicate the study’s design with a commonly used term in the title or the abstract | 2 | a cross-sectional analysis |
| (*b*) Provide in the abstract an informative and balanced summary of what was done and what was found | 2 and 3 | A total of 452 patients with type 2 diabetes were included, and a cross-sectional analysis was performed.  Low FT3 level is an independent risk factor for DKD and DKD progression. FT3 ≤4.30 pmol/L in men and ≤3.99 pmol/L in women will greatly increase the risk of kidney disease progression in patients with type 2 diabetes. |
| Introduction | | | |  |
| Background/rationale | 2 | Explain the scientific background and rationale for the investigation being reported | 4 and 5 | In addition, thyroid hormones interact with the kidneys.  Besides, the kidneys are the target organs for thyroid hormones.  Previous studies have shown that thyroid hormones can interfere with the accumulation of collagen in the cortical interstitium and glomeruli; thyroid-stimulating hormone (TSH) influences kidney disease progression; and low triiodothyronine (T3) levels may play a role in worsening renal function. |
| Objectives | 3 | State specific objectives, including any prespecified hypotheses | 5 | Therefore, the purpose of this study was to explore the correlation between thyroid hormones and the progression risk of type 2 diabetic kidney disease (DKD). |
| Methods | | | |  |
| Study design | 4 | Present key elements of study design early in the paper | 5 | The present cross-sectional study analyzed the hospitalization data of 452 subjects with type 2 diabetes. The risk of DKD progression was evaluated by a combination of urine albumin/urinary creatinine ratio (ACR) and estimated glomerular filtration rate (eGFR). |
| Setting | 5 | Describe the setting, locations, and relevant dates, including periods of recruitment, exposure, follow-up, and data collection | 5 | They were routinely hospitalized in the Department of Endocrinology and Metabolism of the Third Hospital of Nanchang between February 2018 and November 2020. |
| Participants | 6 | (*a*) *Cross-sectional study*—Give the eligibility criteria, and the sources and methods of selection of participants | 5 and 6 | All subjects of this study were patients with type 2 diabetes aged 18 years or above. They were routinely hospitalized in the Department of Endocrinology and Metabolism of the Third Hospital of Nanchang between February 2018 and November 2020.  All subjects participated in the study voluntarily and signed written the informed consent form at admission. The exclusion criteria were as follows: 1) other types of diabetes; 2) taking drugs that affect thyroid hormone levels; 3) urinary tract infections or receiving drugs that affect urine protein; 4) an active urinary sediment (containing red or white blood cells or cellular casts), rapidly increasing albuminuria or nephrotic syndrome, rapidly decreasing eGFR; 5) multiple hospitalizations. A total of 486 patients were enrolled, and 34 patients with incomplete data were excluded. Finally, 452 patients were included in the study. |
| Variables | 7 | Clearly define all outcomes, exposures, predictors, potential confounders, and effect modifiers. Give diagnostic criteria, if applicable | 7 | DKD was defined as eGFR <60 mL/min/1.73 m2 and/or ACR ≥30 mg/g.  Three different renal function classifications were used for the grouping analysis: (1) ACR <30, 30–300 and >300 mg/g were defined as normal albuminuria, microalbuminuria and massive albuminuria, respectively; (2) eGFR ≥90, 60–89, 45–59, 30–44, 15–19 and <15 mL/min/1.73m2 were defined as stages 1, 2, 3a, 3b, 4 and 5 CKD, respectively; and (3) the Kidney Disease: Improving Global Outcomes (KDIGO) classification (15), which combined eGFR with ACR, was used to assess the risk of DKD progression (low, moderate, high or very high risks). (Figure 1) |
| Data sources/measurement | 8* | For each variable of interest, give sources of data and details of methods of assessment (measurement). Describe comparability of assessment methods if there is more than one group | 6 and 7 | An ultrasonic instrument (Omron HNH–318, Japan) was used to measure the height and weight of each patient to the nearest 0.1 cm and 0.1 kg, respectively. These values were used to calculate the body mass index (BMI) by the formula, BMI=weight (kg)/height2 (m2).  Venous blood was collected from patients in the morning in an empty stomach (fasting for at least 8 h). Fasting blood glucose (FBG), serum creatinine (SCr), blood urea nitrogen (BUN), uric acid (UA), serum total cholesterol (TC), triglycerides (TG), high-density lipoprotein cholesterol (HDL-C), and low-density lipoprotein cholesterol (LDL-C) levels were measured on the same autoanalyzer (Roche, Basel, Switzerland). Glycated hemoglobin (HbA1c) was detected using high-performance liquid chromatography (Bio Rad D-10, Berkeley, USA). Chemiluminescence immunoassay was used to measure serum TSH, FT3, and FT4 levels (Siemens ADVIA Centaur XP, Germany). The reference ranges of TSH, FT3, and FT4 levels were 0.38–4.34 mIU/L, 2.77–6.31 pmol/L and 10.45–24.38 pmol/L, respectively. Urine albumin levels were measured using the immunological turbidimetry assay and urine creatinine levels were measured using the picric acid method (Siemens ADVRI 2400, Germany). The urine albumin/creatinine ratio (ACR) was calculated. The eGFR was calculated using the Chronic Kidney Disease Epidemiology Collaboration (CKD-EPI) equation.  DKD was defined as eGFR <60 mL/min/1.73 m2 and/or ACR ≥30 mg/g. Patients with or without DKD were grouped. |
| Bias | 9 | Describe any efforts to address potential sources of bias | 5 | We tried our best to obtain sufficient informed consent from the subjects and avoid selection bias as much as possible. |
| Study size | 10 | Explain how the study size was arrived at | 5 and 6 | They were routinely hospitalized in the Department of Endocrinology and Metabolism of the Third Hospital of Nanchang between February 2018 and November 2020. We tried our best to obtain sufficient informed consent from the subjects and avoid selection bias as much as possible. All subjects participated in the study voluntarily and signed written the informed consent form at admission. The exclusion criteria were as follows: 1) other types of diabetes; 2) taking drugs that affect thyroid hormone levels; 3) urinary tract infections or receiving drugs that affect urine protein; 4) an active urinary sediment (containing red or white blood cells or cellular casts), rapidly increasing albuminuria or nephrotic syndrome, rapidly decreasing eGFR; 5) multiple hospitalizations. A total of 486 patients were enrolled, and 34 patients with incomplete data were excluded. Finally, 452 patients were included in the study. |
| Quantitative variables | 11 | Explain how quantitative variables were handled in the analyses. If applicable, describe which groupings were chosen and why | 7 | Count data are expressed as rates (%). Normally distributed measurement data are expressed as means ± standard deviations.  Non-normally distributed data are expressed as medians (interquartile ranges: 25 and 75 percentile).  DKD was defined as eGFR <60 mL/min/1.73 m2 and/or ACR ≥30 mg/g. Patients with or without DKD were grouped. Three different renal function classifications were used for the grouping analysis: (1) ACR <30, 30–300 and >300 mg/g were defined as normal albuminuria, microalbuminuria and massive albuminuria, respectively; (2) eGFR ≥90, 60–89, 45–59, 30–44, 15–19 and <15 mL/min/1.73m2 were defined as stages 1, 2, 3a, 3b, 4 and 5 CKD, respectively; and (3) the Kidney Disease: Improving Global Outcomes (KDIGO) classification, which combined eGFR with ACR, was used to assess the risk of DKD progression (low, moderate, high or very high risks). (Figure 1) |
| Statistical methods | 12 | (*a*) Describe all statistical methods, including those used to control for confounding | 7 and 8 | All analyses were performed using SPSS 25.0.  The χ² test was used for comparison between groups.  The differences between the groups were calculated using one-way analysis of variance.  The Mann–Whitney and Kruskal–Wallis tests were used to compare between the groups. The correlation between thyroid hormones and various variables were assessed using Spearman’s correlation analysis method. A multivariable logistic regression model was used to analyze the association between thyroid function and diabetic nephropathy. The confounding factors included sex, age, FBG, HbA1c, TC, TG, HDL-C and LDL-C.  P values <0.05 were considered statistically significant. |
|  |  | (*b*) Describe any methods used to examine subgroups and interactions | 8 | To identify the cut-off points for thyroid hormones in assessing the risk of DKD progression, further subgroup analyses by sex were performed. |
|  |  | (*c*) Explain how missing data were addressed | - | N/A |
|  |  | (*d*) If applicable, describe analytical methods taking account of sampling strategy | - | N/A |
|  |  | (*e*) Describe any sensitivity analyses | - | N/A |
| **Results** |  |  |  |  |
| Participants | 13* | (a) Report numbers of individuals at each stage of study—eg numbers potentially eligible, examined for eligibility, confirmed eligible, included in the study, completing follow-up, and analysed | 8 | Among the 452 subjects, 188 (41.6%) had diabetic nephropathy, 264 (58.4%) did not have diabetic nephropathy and there was no significant difference between female and male (P>0.05). |
|  |  | (b) Give reasons for non-participation at each stage | - | N/A |
|  |  | (c) Consider use of a flow diagram | - | N/A |
| Descriptive data | 14* | (a) Give characteristics of study participants (eg demographic, clinical, social) and information on exposures and potential confounders | 8 and 9 | Compared with the patients without DKD, patients with DKD were a little younger, had lower eGFR, FT3 and FT4 levels, had higher BUN, SCr, UA, LDL-C, ACR and TSH levels (P<0.05). (Table 1)  In subjects with DKD, the overall prevalence of thyroid dysfunction (any of hyperthyroidism or subclinical hyperthyroidism or hypothyroidism or subclinical hypothyroidism) was 22.9%, compared with 17.5% in patients without DKD (P=0.009). The proportion of subclinical hypothyroidism in DKD group was observed as high as 19.7%, which was significantly different from that in the non-DKD group (9.5%). (Figure 2) |
|  |  | (b) Indicate number of participants with missing data for each variable of interest | - | N/A |
| Outcome data | 15* | Report numbers of outcome events or summary measures | 9 and 10 | Due to the small numbers of people in stages 4 and 5 CKD, we combined the two groups into eGFR<30 mL/min/1.73m2. The results showed that FT3 levels varied with degrees of albuminuria, kidney damage, and KDIGO risk (P<0.05), and decreased with increasing severity. FT4 levels decreased with worsening CKD stage, and TSH levels increased with a higher risk of KDIGO categories (P<0.05). (Table 2)  There was a negative correlation between FT3 and FT4 levels with both SCr and ACR (r=-0.168, P<0.001 and r=-0.107, P=0.023; r=-0.267, P<0.001 and r=-0.109, P=0.021, respectively). Meanwhile, FT3 and FT4 levels were positively correlated with eGFR (r=0.325, P<0.001 and r=0.165, P<0.001, respectively). In contrast, there was a negative correlation between TSH levels and eGFR (r=-0.128, P=0.006), and a positive correlation between TSH levels and ACR (r=0.104, P=0.027). (Table 3) |
| Main results | 16 | (*a*) Give unadjusted estimates and, if applicable, confounder-adjusted estimates and their precision (eg, 95% confidence interval). Make clear which confounders were adjusted for and why they were included | 11 and 12 | A logistic regression analysis was performed, using with or without diabetic nephropathy as the dependent variable and using thyroid hormone levels as the independent variable. After adjusting for sex, age, FBG, HbA1c, TC, TG, HDL-C and LDL-C, an increase in FT3 levels significantly reduced the risk of having diabetic nephropathy [odds ratio, OR (95% confidence interval, CI)=0.58 (0.42–0.79), P=0.001]. However, FT4 and TSH levels did not influence the risk of disease [OR (95% CI) of FT4=0.97 (0.92–1.02), P=0.281; OR (95% CI) of TSH=1.02 (0.99–1.05), P=0.147]. (Table 4)  The risk of diabetic nephropathy progression (KDIGO risk categories) was further used as the dependent variable. When using the low KDIGO risk group as the reference group, an increase in FT3 level significantly reduced the risk of DKD progression [moderate risk, OR (95% CI)=0.65 (0.45–0.93), P=0.020; high or very high risk, OR (95% CI)=0.50 (0.33–0.74), P=0.001]. (Table 5) |
|  |  | (*b*) Report category boundaries when continuous variables were categorized | 9, 10 and 13 | The category boundaries of continuous variables are showed in Table 2 and 6. |
|  |  | (*c*) If relevant, consider translating estimates of relative risk into absolute risk for a meaningful time period | - | N/A |
| Other analyses | 17 | Report other analyses done—eg analyses of subgroups and interactions, and sensitivity analyses | 12 | Further, the KDIGO risk categories were the dependent variables in the subgroup analysis (reference: the low risk group), and the tri-sectional quantiles of FT3 were the independent variables (reference: the highest tertile). The results showed that the lowest tertile of FT3 not only increased the high or very high risk of DKD progression in men [OR (95% CI)=3.66 (1.54–8.71), P=0.003], but also increased all risks of DKD progression in women [moderate risk, OR (95% CI)=2.37 (1.02–5.51), P=0.044; high or very high risk, OR (95% CI)=7.23 (1.72–30.34), P=0.007]. Therefore, we obtained two cut-off points for FT3 to assess the increased risk of DKD progression, which were less than 4.30 pmol/L for men and less than 3.99 pmol/L for women, respectively. (Table 6) |
| **Discussion** |  |  |  |  |
| Key results | 18 | Summarise key results with reference to study objectives | 13 and 14 | Our results showed that FT3 and FT4 were negatively correlated with SCr and ACR and positively correlated with eGFR. In contrast, TSH was negatively correlated with eGFR and positively correlated with ACR. These findings were consistent with previous studies and suggested that thyroid hormones were related to renal function in patients with diabetes.  Our further findings showed that FT3 levels decreased gradually with increased severity of kidney damage and albuminuria.  TSH levels increased and FT3 levels decreased in higher risk groups of DKD progression, using the KDIGO classification.  In order to confirm the strong association between thyroid hormones and DKD, a logistic regression analysis was performed. Our study suggested that the increase in FT3 level significantly reduced the risks of DKD and DKD progression by about 35–50%. |
| Limitations | 19 | Discuss limitations of the study, taking into account sources of potential bias or imprecision. Discuss both direction and magnitude of any potential bias | 16 and 17 | However, this study has some limitations. First, this was a cross-sectional study, and causality could not be established. Further prospective and longitudinal studies should be conducted. Second, the thyroid autoantibodies of the patients were not evaluated. Studies have shown that anti-thyroid peroxidase antibodies may be related to endothelial dysfunction and subsequent microalbuminuria. Third, the study population consisted of hospitalized patients with type 2 diabetes, hence, the results could not represent the overall population. |
| Interpretation | 20 | Give a cautious overall interpretation of results considering objectives, limitations, multiplicity of analyses, results from similar studies, and other relevant evidence | 15 and 16 | The role of FT3 in diabetic nephropathy progression is unclear. However, there are some hypotheses. Firstly, endothelial dysfunction and podocyte disease play a key role in the pathogenesis and development of DKD. Microalbuminuria is a sign of systemic endothelial dysfunction and vascular damage, and thyroid hormones can affect vasodilation, regulate endothelial function and homeostatic signal transduction processes. Experimental models have confirmed that T3 can directly or indirectly relax vascular smooth muscle cells, thereby affecting endothelial function. In patients with stage 3–4 CKD without diabetes, it was also proven that low serum FT3 level was related to endothelial dysfunction assessed by the blood flow-mediated expansion method. On the contrary, sufficient T3 can promote podocyte redifferentiation, reduce hypertrophy, and improve the kidney structure. Secondly, hyperglycemia can lead to an increase of renal cell cytoplasmic glucose concentration, which leads to the activation of various signaling pathways and oxidative stress. However, T3 can reduce renal cortex collagen accumulation and glomerular matrix expansion in db/db mice, improve kidney damage in diabetic mice, increase renal PI3K activity, and reduce hyperglycemia. Besides, T3 can reduce renal transforming growth factor-β1 expression, promote insulin synthesis and release, enhance insulin signal transduction, and improve insulin resistance. Therefore, low T3 levels may indirectly aggravate DKD progression by concomitant hyperglycemia. Thirdly, it was confirmed in an animal study that overexpressed sirtuin 1 (SIRT1) in podocytes and renal tubular cells can reduce albuminuria and kidney damage. 3,5-diiodothyronine, the natural metabolite of T3 in the deiodination pathway, can prevent a significant decrease in the activity of SIRT1 in the kidneys of diabetic rats, and can inhibit renal tubular epithelium cell nuclear factor-κB acetylation and c-Jun N-terminal kinase phosphorylation, which ultimately play a role in protecting the kidneys. Fourthly, inflammation seriously interferes with the thyroid function in subjects with CKD. In these patients, an independent negative correlation between inflammatory cytokines (tumor necrosis factor-α, interleukin-6, and C-reactive protein) and FT3 was observed. |
| Generalisability | 21 | Discuss the generalisability (external validity) of the study results | 16 | Beyond doubt, similar results were obtained in both men and women in the subgroup analyses. More seriously, women with a low FT3 level had a maximum risk of DKD progression by 7.23 times. The clinical significance of the results was to set the low FT3 threshold to predict the prognosis of chronic kidney disease, which were less than 4.30 pmol/L for men and less than 3.99 pmol/L for women, respectively. |
| Other information |  |  |  |  |
| Funding | 22 | Give the source of funding and the role of the funders for the present study and, if applicable, for the original study on which the present article is based | 18 | This work was supported by the National Natural Science Foundation of China [grant number 81760153, Recipient: Peng Duan], the Key Research and Development Programs by Science and Technology Department of JiangXi Province [grant numbers 20171BBG70058, 20171ACH80002 and 20181BBG70014, Recipient: Zhi Yang, Ping Tu and Jiang Liu], the Science and Technology Support Project by Science and Technology Department of Nangchang City [grant number [2020]133, Recipient: Peng Duan]. |

**Note:** *Give information separately for exposed and unexposed groups.
